# Supplementary material for: Jumping performance in the highly aquatic frog, Xenopus tropicalis: sex-specific relationships between morphology and performance
Source: PeerJ. 2014 Nov 4;2:e661. doi: 10.7717/peerj.661 (PMC4226644; doi:10.7717/peerj.661)
Supplement: Supplemental Information 1 — File providing raw peak jump force data for each individual. Provided are the resultant forces, the peak vertical forces and the peak horizontal forces. [file peerj-02-661-s001.xlsx]

## Sheet: Sheet1
individual	peak resultant force	peak vertical force	peak horizontal force
1127967556371073	-0.3974	-0.3979	-0.8323
1141902846132864	-0.182	-0.1824	-0.7155
1143002357760640	-0.0895	-0.3215	-0.1121
1146494166172288	-0.3479	-0.3565	-0.9686
1147585087865472	-0.6371	-0.6478	-1.1871
1159353298256512	-0.4652	-0.6696	-0.4979
1160444219949696	-0.2824	-0.284	-0.7503
1164816496657024	-0.0246	-0.054	-0.4174
1164850856395392	-0.0616	-0.0888	-0.4208
1164876626199168	-0.23	-0.2343	-1.0822
1180450177614464	-0.0376	-0.062	-0.0376
1186029340131968	-0.7085	-0.7878	-0.9655
1187111671890560	-0.271	-0.2725	-1.1017
1190414501741184	-0.6849	-0.9626	-0.7306
1194838318056064	-0.3709	-0.3737	-1.3163
1195890585043584	-0.174	-0.2381	-0.4704
1197926399541888	-0.339	-0.3401	-1.0435
1200322991293056	-0.702	-0.7033	-1.2788
1202522014548608	-0.3478	-0.426	-0.6075
1203569986568832	-0.1928	-0.2027	-0.7113
1203608641274496	-0.5072	-0.5935	-0.7494
1203612936241792	-0.0249	-0.0301	-0.778
1203634411078272	-0.4635	-0.4815	-0.7068
1204566418981504	-0.3016	-0.341	-0.6318
1204660908262016	-0.8462	-0.8539	-1.5771
1207950853210752	-0.1756	-0.2725	-0.3975
1208002392818304	-0.373	-0.3883	-0.9567
1210141286531712	-0.2012	-0.6904	-0.2193
1211223618290304	-0.713	-0.7352	-1.2189
1211232208224896	-0.8893	-0.9031	-1.1786
1214389009187456	0.2287	0.1807	-0.1224
1214620937421440	-0.4085	-0.4112	-1.0709
1215535765455488	-0.346	-0.3526	-0.5631
1215664614474368	-0.2504	-0.3615	-0.4491
1216751241200256	-0.2698	-0.301	-0.7061
1217837867926144	-0.0757	-0.0814	-0.558
1218748400992896	-0.2022	-0.2161	-0.7123
1219865092489856	-0.3046	-0.3063	-0.6733
1220938834313856	-0.095	-0.1152	-0.4008
1221153582678656	-0.0959	-0.1018	-0.2368
1221157877645952	-0.6586	-0.7167	-0.9735
1221170762547840	-0.4751	-0.4841	-0.6571
1221183647449728	-0.4552	-0.5452	-0.6899
1222055525810816	-0.4021	-0.4522	-0.5852
1224207304426112	-0.5332	-0.5607	-0.9352
1249534726570624	-0.7337	-0.757	-1.0019
1249590561145472	-0.3189	-0.3233	-0.6335
1255204083401344	-0.417	-0.4584	-0.7974
1261762498462336	-0.3186	-0.3233	-0.7778
1272753319772800	-0.3519	-0.3605	-0.8666
1279414814048896	-0.1562	-0.1662	-0.7456
1282631744553600	-0.3043	-0.3045	-1.0684
1282648924422784	-0.0073	-0.0123	-0.6406
1283714076312192	-0.7402	-0.7773	-1.0304
1284852242645632	-0.2902	-0.3072	-0.8521
1285947459306112	-0.1919	-0.1925	-1.2334
1289198749549184	-0.7471	-0.8013	-0.9044
1292600363647616	-0.2843	-0.2874	-1.0371
1300825226019456	-0.215	-0.2154	-0.8968
1301293377454720	-0.5969	-0.7399	-0.5969
1304317034431104	-0.1244	-0.2299	-0.1244
1304359984104064	-0.0531	-0.0535	-0.3807
1305412251091584	-0.4754	-0.4868	-0.7399
1305446610829952	-0.7075	-0.7282	-1.2287
1306498877817472	-0.4271	-0.4306	-1.263
1306537532523136	-0.4505	-0.4559	-1.0721
1306657791607424	-0.1639	-0.1656	-0.9862
1306692151345792	-0.3114	-0.4112	-0.5282
1306739395986048	-0.4515	-0.4522	-1.7006
1307813137810048	-0.1029	-0.1169	-0.7048
1307826022711936	-0.8449	-0.8477	-0.9377
1308680721203840	0.0008	-0.015	-0.5753
1309771642897024	-0.0507	-0.1046	-0.38
1309840362373760	-0.3593	-0.3716	-0.9881
1310042225836672	-0.1683	-0.1772	-0.8659
1310158189953664	-0.3865	-0.3904	-0.9089
1312129579942528	-0.3641	-0.3675	-1.0741
1313113127453312	-0.3216	-0.327	-0.6413
1313220501635712	-0.9483	-1.1192	-1.0152
1313237681504896	-0.4843	-0.4895	-0.6942
1313323580850816	-0.2354	-0.2749	-0.3563
1313327875818112	-0.2055	-0.2111	-0.6605
1313345055687168	-0.3232	-0.3288	-0.9312
1314268473655936	-0.0651	-0.0788	-0.671
1315243431232128	-0.5772	-0.6073	-0.8073
1315445294695040	-0.1243	-0.129	-0.6997
1315522604106368	-0.4219	-0.4295	-0.9939
1315539783975552	-0.2114	-0.2154	-0.7743
1315565553779328	-0.5585	-0.5686	-0.8536
1316347237827200	-0.1329	-0.1391	-0.6592
1316351532794496	-0.1798	-0.1805	-0.8151
1316682245276288	-0.376	-0.382	-0.9199
1317558418604672	-0.1201	-0.1343	-0.5462
1317652907885184	-0.1622	-0.1675	-0.7515
1317755987100288	-0.3529	-0.3675	-0.7119
1317777461936768	-0.4699	-0.4763	-0.6872
1318619275526784	-0.2625	-0.3615	-0.4627
1318662225199744	-0.1927	-0.2007	-0.676
1319851931140736	-0.3173	-0.3429	-0.794
1319907765715584	-0.4652	-0.5058	-0.8492
1320032319767168	-0.1853	-0.2757	-0.4192
1321002982376064	-0.1421	-0.2111	-0.1421
1321080291787392	-0.1249	-0.1409	-0.7001
1322171213480576	-0.138	-0.1463	-0.7532
1322175508447872	-0.1267	-0.2916	-0.9926
1322991552234112	-0.2357	-0.2916	-0.5578
1323081746547328	-0.6917	-0.7986	-0.897
1323116106285696	-0.1225	-0.1238	-0.9108
1324155488371328	-0.3615	-0.3737	-0.9931
1324335876997760	-0.1758	-0.2125	-0.5795
1325259294966400	-0.6015	-0.6055	-1.14
1325263589933696	-0.3108	-0.3215	-0.4745
1326169828033152	-0.0605	-0.0857	-0.3063
1327445433320064	-0.2371	-0.2464	-0.9246
1327484088025728	-0.3631	-0.3665	-0.8126
1330576464478848	-0.422	-0.4225	-0.8968
1330593644348032	-0.49	-0.5031	-0.9193
1333887884264064	-0.5248	-0.6234	-0.7436
1333913654067840	-0.479	-0.4802	-1.0692
1334995985826432	-0.2527	-0.2541	-0.6599
1337233663787648	0.1017	-0.4908	0.0871
1338260160971392	-0.5111	-0.52	-0.9531
1343753424142976	-0.2087	-0.2487	-0.5958
1343770604012160	0.0792	0.058	-0.4323
no tag	-0.0911	-0.0958	-0.9243
